# Supplementary material
Source: publisher site journal article supplement (https://www.dovepress.com/article/254323)
Supplement: Supplementary file 1 [file get_supplementary_file.php]

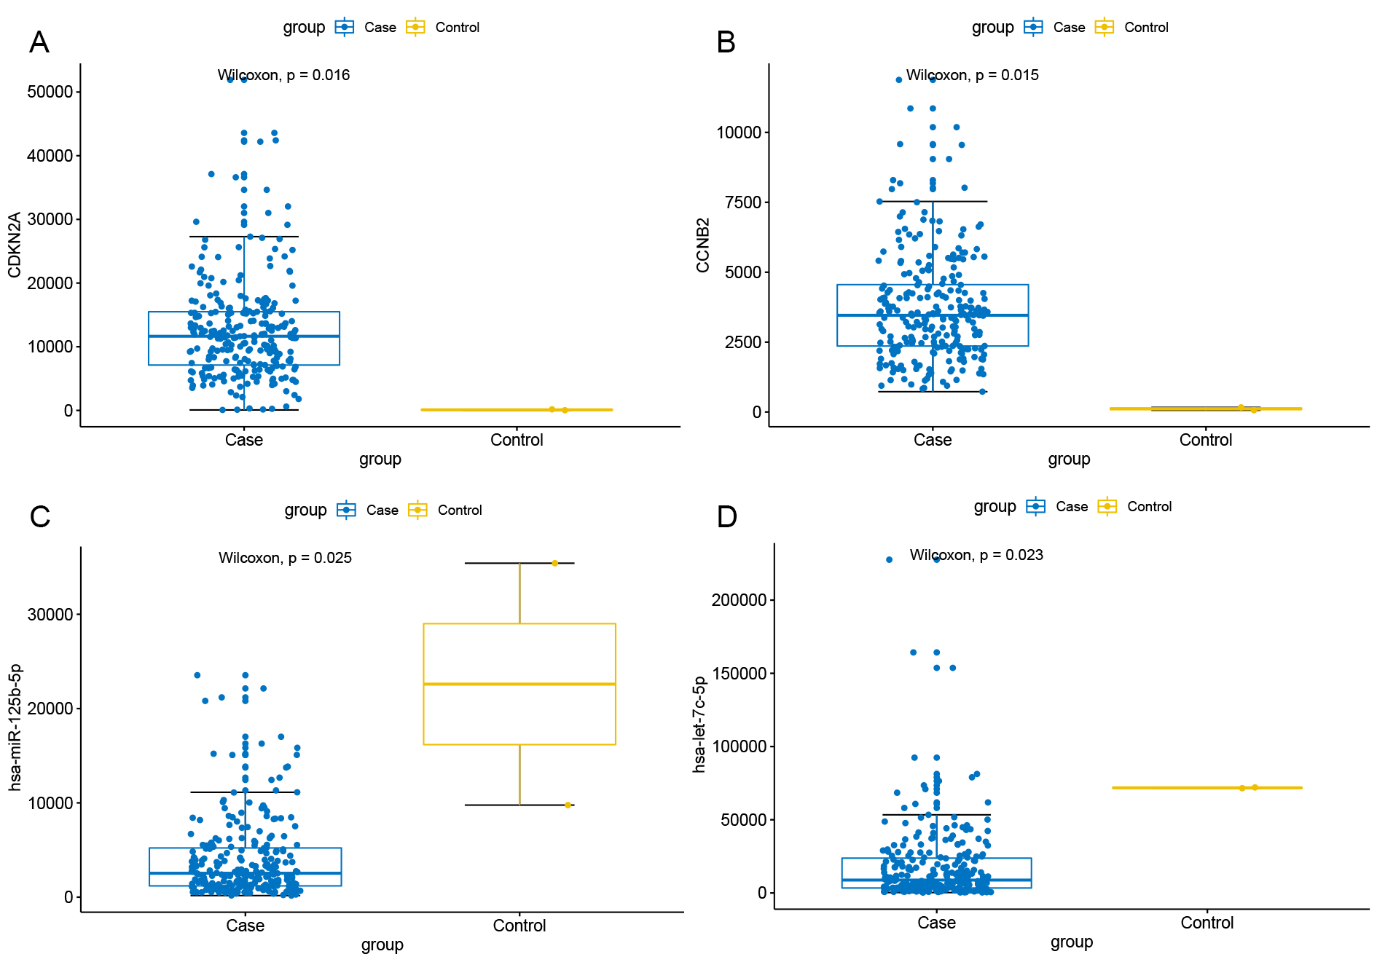


**Figure S1** Validation of the expression of selected DEmRNAs and DEmiRNAs in CSCC.

A) CDKN2A, B) CCNB2, C) hsa-miR-125b-5p, D) hsa-let-7c-5p.


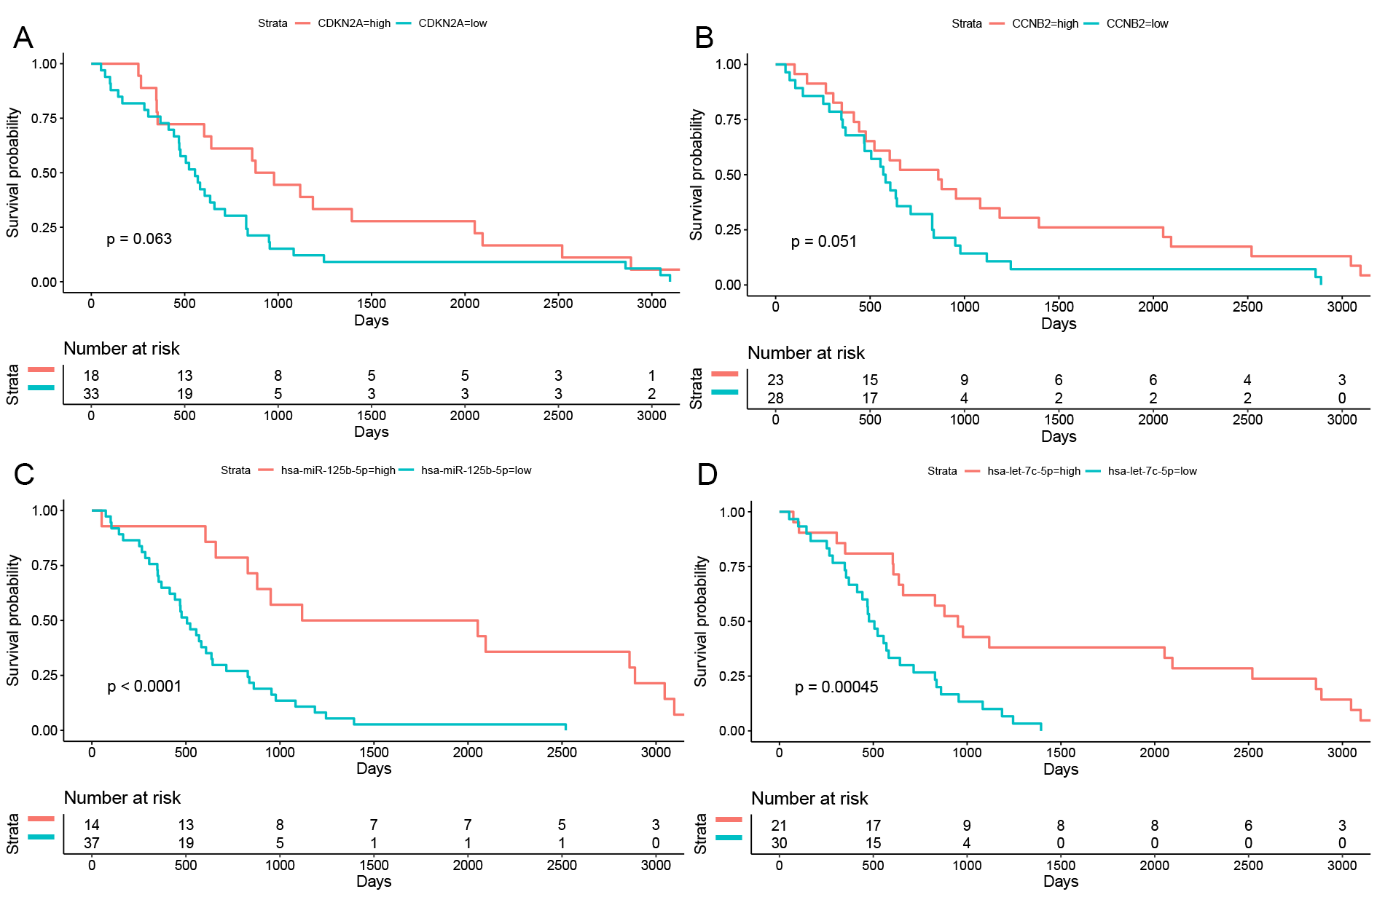


**Figure S2** Survival analysis of selected DEmRNAs and DEmiRNAs in CSCC.

A) CDKN2A, B) CCNB2, C) hsa-miR-125b-5p, D) hsa-let-7c-5p. The x-axis indicated times (days) and y-axis indicated survival rate.

**Table S1** Clinical characteristics

| Index | Age (years) | Clinical stage | HPV status | Grade | Tumor size (mm) | Lymph node metastasis |
| --- | --- | --- | --- | --- | --- | --- |
| 1 | 47 | IB2 | 16 | 1 | 30 | Negative |
| 2 | 52 | IIA1 | 16, 54 | 1 | 40 | Negative |
| 3 | 64 | IB2 | 16 | 3 | 22 | Negative |
| 4 | 40 | IB3 | 16 | 3 | 20 | Negative |
| 5 | 63 | IB3 | - | 2 | 38 | Positive |
| 6 | 51 | IIA2 | - | 1 | 50 | Negative |
